# Supplementary material for: Synergistic effects of steric constraints and non-covalent interactions in copper(ii) chloro-nitro-benzoato complexes: synthesis, structural characterization, theoretical investigations, antimicrobial studies, and molecular docking analyses
Source: Royal Society of Chemistry journal article supplement (doi:10.1039/d3nj05361j), 2024-01-01
Supplement: d3nj05361j1.pdf [file d3nj05361j1.pdf]

**Synergistic Effects of Steric Constraints and Non-covalent Interactions in Copper(II)  
Chloro-Nitro-Benzoato Complexes: Synthesis, Structural Characterization, Theoretical  
Investigations, Antimicrobial Studies, and Molecular Docking Analyses**

Chetan Chauhan,<sup>a</sup> Santosh Kumar,<sup>a\*</sup> Rajesh Kumar,<sup>a</sup> Anju Saini,<sup>b</sup> Thammarat Aree,<sup>c\*</sup>

<sup>a</sup> Department of Chemistry, Himachal Pradesh University, Summer Hill, Shimla, India.

<sup>b</sup> YDoS, Punjabi University G K Campus, T. Sabo, Punjab, India.

<sup>c</sup> Department of Chemistry, Faculty of Science, Chulalongkorn University, Bangkok, Thailand.

Corresponding Author Email: [santosh.chem88@gmail.com](mailto:santosh.chem88@gmail.com) (S.Kumar), [thammarat.aree@gmail.com](mailto:thammarat.aree@gmail.com) (T. Aree)

**Supplementary Information**

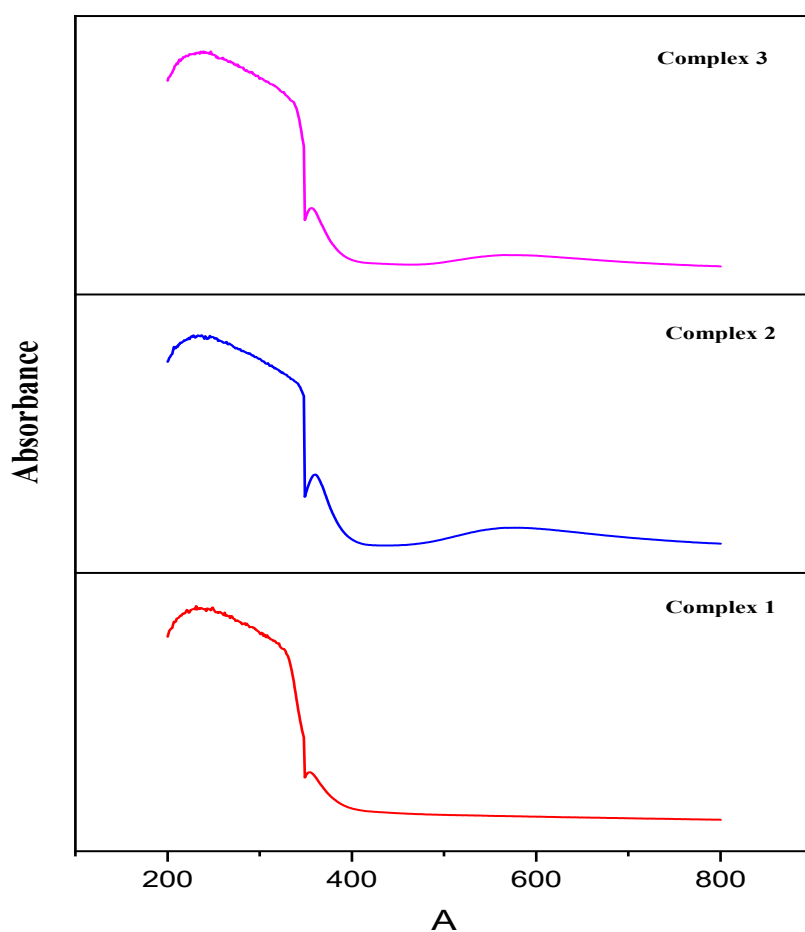

**Figure S1: UV spectra of complexes 1-3**

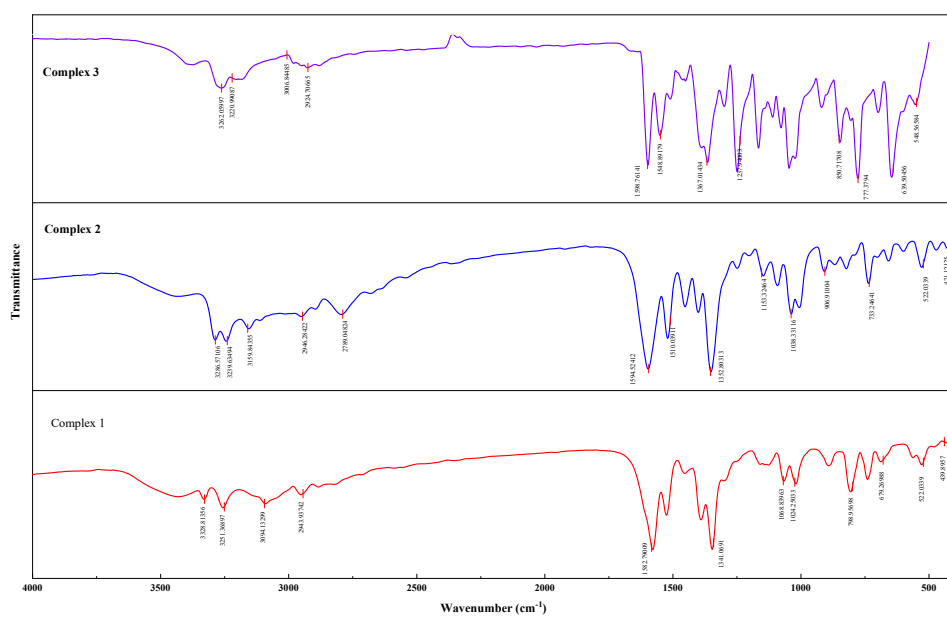

Figure S2 Experimental FT-IR spectra of complexes 1-3

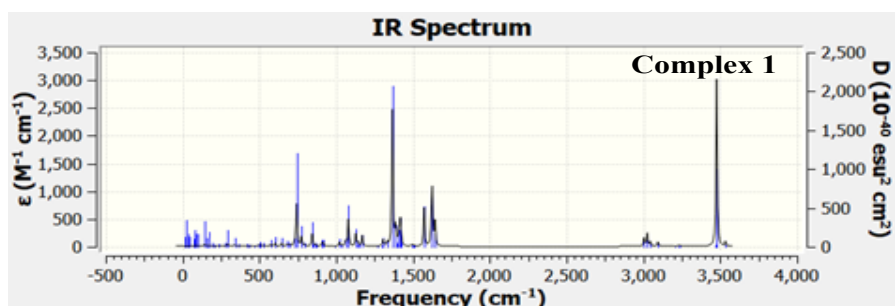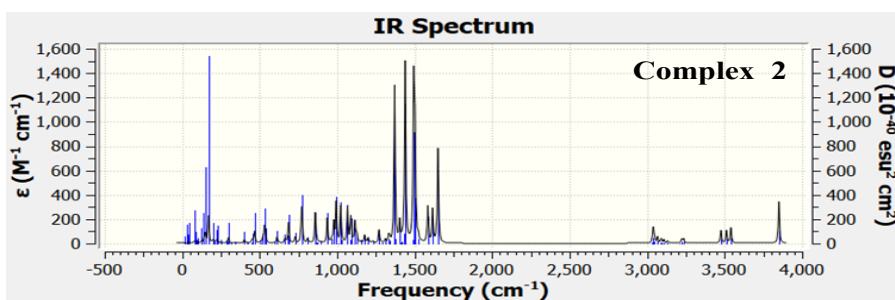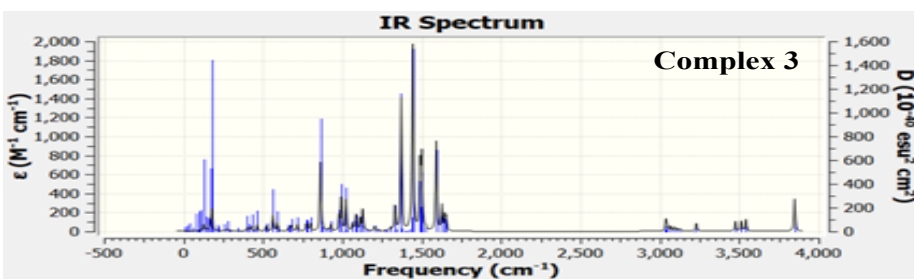

Figure S3: Theoretical elucidation of FT-IR from DFT calculations for complexes 1-3.

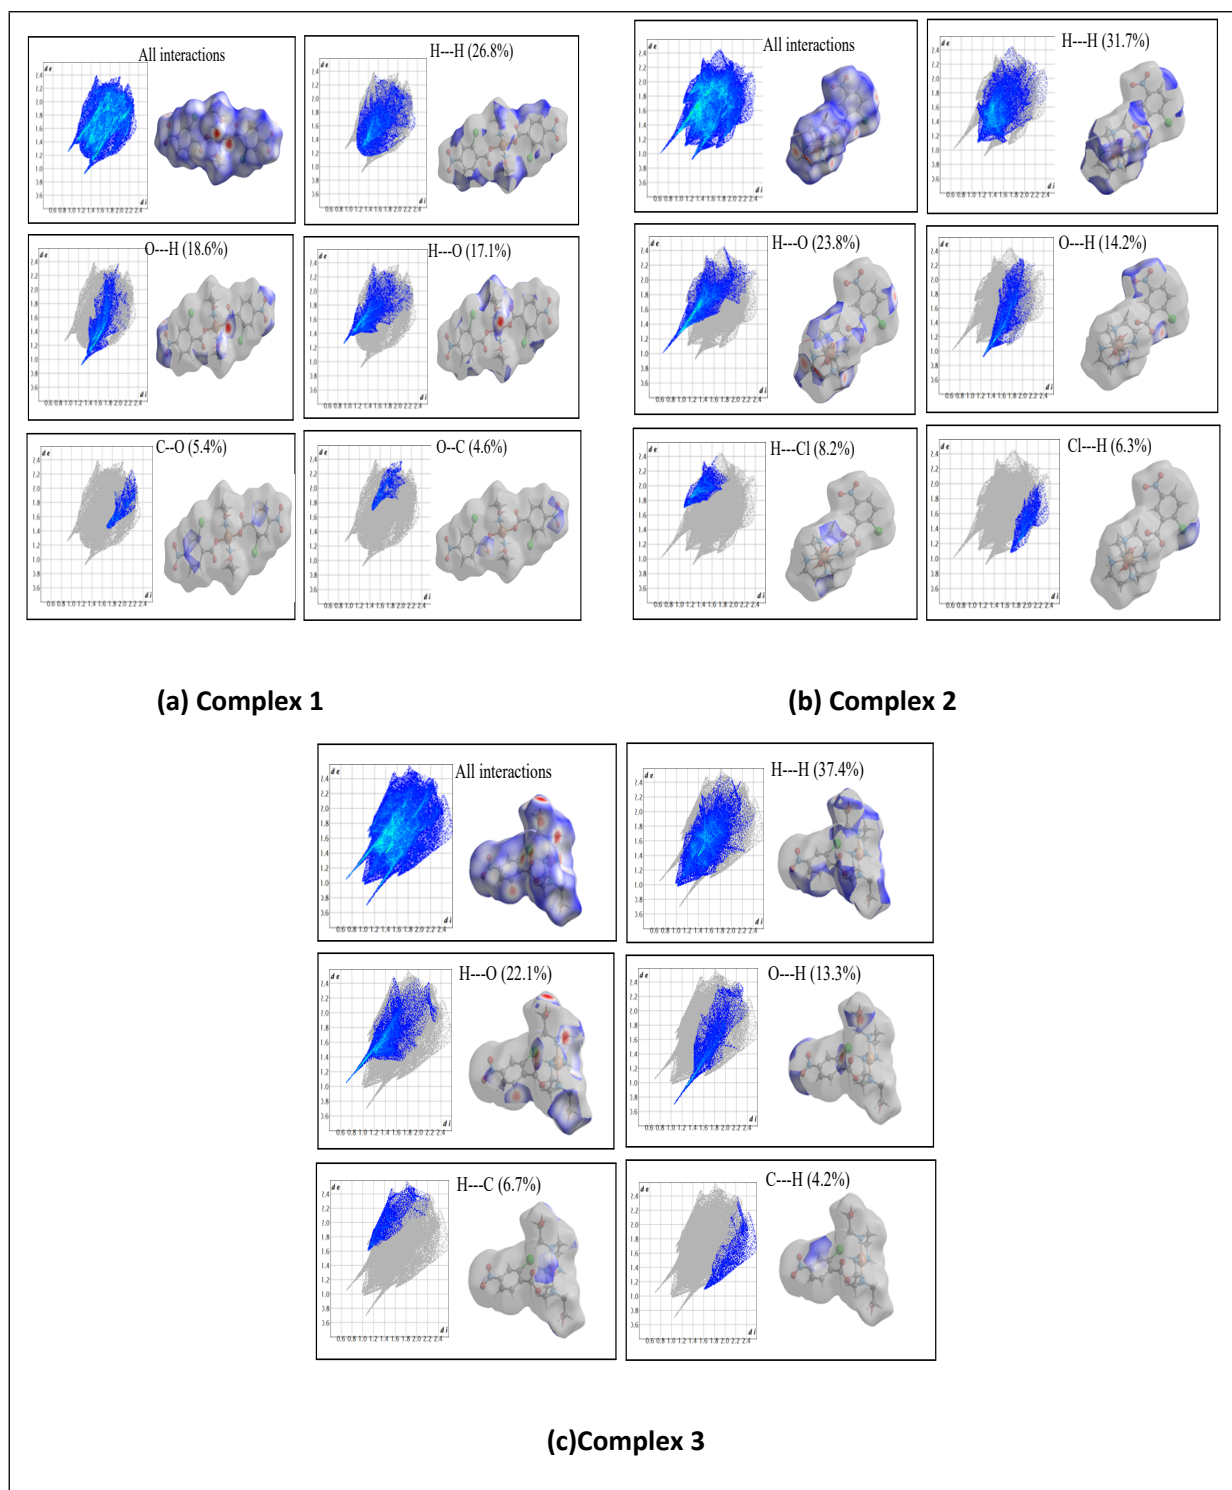

**Figure S4: Fingerprint plots of various non-covalent interactions in complexes 1-3 single crystals.**

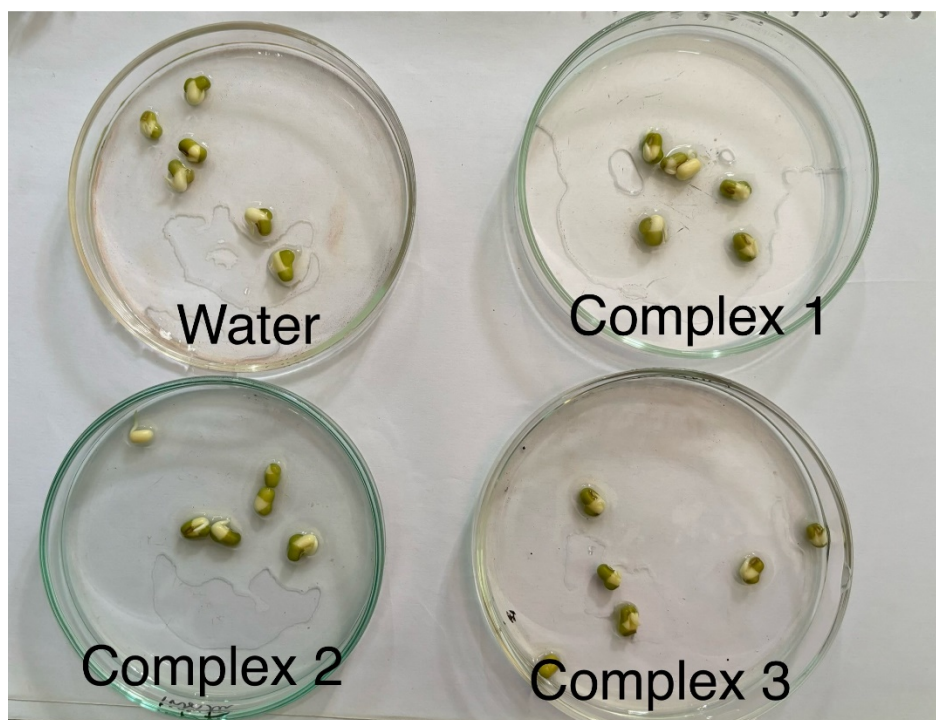

**Figure S5:** Phytotoxicity assessment: seed germination assay of *Vigna radiata* with Complexes 1-3.

**Table S1 (a) Bond Lengths for Complex 1.**

| Atom | Atom            | Length/Å | Atom | Atom | Length/Å |
|------|-----------------|----------|------|------|----------|
| Cu1  | O1 <sup>1</sup> | 2.402(2) | O5   | N2   | 1.217(3) |
| Cu1  | O1              | 2.402(2) | N1   | C2   | 1.472(4) |
| Cu1  | O2 <sup>1</sup> | 2.061(2) | N2   | C7   | 1.483(4) |
| Cu1  | O2              | 2.061(2) | C1   | C2   | 1.494(5) |
| Cu1  | N1 <sup>1</sup> | 1.983(2) | C3   | C4   | 1.512(4) |
| Cu1  | N1              | 1.983(2) | C4   | C5   | 1.401(4) |
| C11  | C5              | 1.738(3) | C4   | C9   | 1.393(4) |
| O1   | C1              | 1.427(4) | C5   | C6   | 1.377(4) |
| O2   | C3              | 1.271(3) | C6   | C7   | 1.389(4) |
| O3   | C3              | 1.236(4) | C7   | C8   | 1.370(4) |
| O4   | N2              | 1.210(3) | C8   | C9   | 1.378(4) |

<sup>1</sup>-X,1-Y,2-Z

**Table S2 (b) Bond Angles for Complex 1.**

| Atom            | Atom | Atom            | Angle/°   | Atom | Atom | Atom | Angle/°  |
|-----------------|------|-----------------|-----------|------|------|------|----------|
| O1              | Cu1  | O1 <sup>1</sup> | 180.00(9) | O4   | N2   | C7   | 118.8(3) |
| O2              | Cu1  | O1 <sup>1</sup> | 86.33(7)  | O5   | N2   | C7   | 117.7(3) |
| O2 <sup>1</sup> | Cu1  | O1 <sup>1</sup> | 93.67(7)  | O1   | C1   | C2   | 112.1(3) |

| Atom            | Atom | Atom            | Angle/°    | Atom | Atom | Atom | Angle/°  |
|-----------------|------|-----------------|------------|------|------|------|----------|
| O2              | Cu1  | O1              | 93.67(7)   | N1   | C2   | C1   | 110.8(3) |
| O2 <sup>1</sup> | Cu1  | O1              | 86.33(7)   | O2   | C3   | C4   | 116.9(3) |
| O2              | Cu1  | O2 <sup>1</sup> | 180.0      | O3   | C3   | O2   | 126.3(3) |
| N1 <sup>1</sup> | Cu1  | O1 <sup>1</sup> | 80.24(9)   | O3   | C3   | C4   | 116.8(3) |
| N1              | Cu1  | O1              | 80.24(9)   | C5   | C4   | C3   | 124.6(3) |
| N1 <sup>1</sup> | Cu1  | O1              | 99.76(9)   | C9   | C4   | C3   | 117.9(3) |
| N1              | Cu1  | O1 <sup>1</sup> | 99.76(9)   | C9   | C4   | C5   | 117.5(3) |
| N1              | Cu1  | O2 <sup>1</sup> | 88.82(9)   | C4   | C5   | C11  | 121.0(2) |
| N1 <sup>1</sup> | Cu1  | O2 <sup>1</sup> | 91.18(9)   | C6   | C5   | C11  | 117.1(2) |
| N1 <sup>1</sup> | Cu1  | O2              | 88.82(9)   | C6   | C5   | C4   | 121.7(3) |
| N1              | Cu1  | O2              | 91.18(9)   | C5   | C6   | C7   | 117.9(3) |
| N1 <sup>1</sup> | Cu1  | N1              | 180.00(9)  | C6   | C7   | N2   | 118.1(3) |
| C1              | O1   | Cu1             | 102.10(17) | C8   | C7   | N2   | 119.2(3) |
| C3              | O2   | Cu1             | 126.6(2)   | C8   | C7   | C6   | 122.7(3) |
| C2              | N1   | Cu1             | 111.86(19) | C7   | C8   | C9   | 118.1(3) |
| O4              | N2   | O5              | 123.6(3)   | C8   | C9   | C4   | 122.0(3) |

<sup>1</sup>-X,1-Y,2-Z

**Table S2 (a) Bond Lengths for Complex 2**

| Atom | Atom            | Length/Å   | Atom | Atom | Length/Å |
|------|-----------------|------------|------|------|----------|
| Cu1  | N1 <sup>1</sup> | 2.0245(17) | N3   | C10  | 1.467(3) |
| Cu1  | N1              | 2.0245(17) | C1   | C2   | 1.514(3) |
| Cu1  | N2              | 2.0373(17) | C3   | C4   | 1.507(3) |
| Cu1  | N2 <sup>1</sup> | 2.0373(17) | C5   | C6   | 1.523(3) |
| O1   | C4              | 1.420(3)   | C6   | C7   | 1.382(3) |
| O2   | C5              | 1.242(3)   | C6   | C11  | 1.394(3) |
| O3   | C5              | 1.243(3)   | C7   | C8   | 1.391(3) |
| O4   | N3              | 1.209(3)   | C7   | C11  | 1.737(2) |
| O5   | N3              | 1.226(3)   | C8   | C9   | 1.375(4) |
| N1   | C1              | 1.480(3)   | C9   | C10  | 1.366(4) |
| N2   | C2              | 1.482(3)   | C10  | C11  | 1.379(3) |
| N2   | C3              | 1.480(3)   |      |      |          |

<sup>1</sup>-X,1-Y,1-Z

**Table S2(b) Bond Angles for Complex 2.**

| Atom            | Atom | Atom            | Angle/°    | Atom | Atom | Atom | Angle/°    |
|-----------------|------|-----------------|------------|------|------|------|------------|
| N1 <sup>1</sup> | Cu1  | N1              | 180.0      | O1   | C4   | C3   | 111.72(18) |
| N1              | Cu1  | N2 <sup>1</sup> | 94.31(7)   | O2   | C5   | O3   | 127.3(2)   |
| N1 <sup>1</sup> | Cu1  | N2 <sup>1</sup> | 85.69(7)   | O2   | C5   | C6   | 117.8(2)   |
| N1 <sup>1</sup> | Cu1  | N2              | 94.31(7)   | O3   | C5   | C6   | 114.9(2)   |
| N1              | Cu1  | N2              | 85.69(7)   | C7   | C6   | C5   | 125.0(2)   |
| N2              | Cu1  | N2 <sup>1</sup> | 180.0      | C7   | C6   | C11  | 117.3(2)   |
| C1              | N1   | Cu1             | 109.45(13) | C11  | C6   | C5   | 117.7(2)   |

| Atom | Atom | Atom | Angle/°    | Atom | Atom | Atom | Angle/°    |
|------|------|------|------------|------|------|------|------------|
| C2   | N2   | Cu1  | 106.96(13) | C6   | C7   | C8   | 122.3(2)   |
| C3   | N2   | Cu1  | 111.63(13) | C6   | C7   | C11  | 121.03(18) |
| C3   | N2   | C2   | 115.99(18) | C8   | C7   | C11  | 116.65(19) |
| O4   | N3   | O5   | 123.4(2)   | C9   | C8   | C7   | 119.4(2)   |
| O4   | N3   | C10  | 119.0(2)   | C10  | C9   | C8   | 118.7(2)   |
| O5   | N3   | C10  | 117.6(2)   | C9   | C10  | N3   | 118.8(2)   |
| N1   | C1   | C2   | 108.55(18) | C9   | C10  | C11  | 122.4(2)   |
| N2   | C2   | C1   | 111.07(17) | C11  | C10  | N3   | 118.8(2)   |
| N2   | C3   | C4   | 113.57(17) | C10  | C11  | C6   | 119.8(2)   |

<sup>1</sup>-X,1-Y,1-Z

**Table S3 (a) Bond Lengths for Complex 3.**

| Atom | Atom            | Length/Å | Atom | Atom | Length/Å |
|------|-----------------|----------|------|------|----------|
| Cu1  | N1 <sup>1</sup> | 2.035(3) | N2   | C1   | 1.488(5) |
| Cu1  | N1              | 2.035(3) | N3   | C9   | 1.473(5) |
| Cu1  | N2              | 2.025(3) | C1   | C2   | 1.512(6) |
| Cu1  | N2 <sup>1</sup> | 2.025(3) | C3   | C4   | 1.522(5) |
| C11  | C7              | 1.749(4) | C5   | C6   | 1.517(5) |
| O1   | C4              | 1.400(5) | C6   | C7   | 1.379(5) |
| O2   | C5              | 1.232(4) | C6   | C11  | 1.389(5) |
| O3   | C5              | 1.260(4) | C7   | C8   | 1.382(5) |
| O4   | N3              | 1.205(5) | C8   | C9   | 1.367(5) |
| O5   | N3              | 1.224(5) | C9   | C10  | 1.371(5) |
| N1   | C2              | 1.473(4) | C10  | C11  | 1.394(5) |
| N1   | C3              | 1.479(4) |      |      |          |

<sup>1</sup>2-X,-Y,1-Z

**Table S3 (b) Bond Angles for Complex 3.**

| Atom            | Atom | Atom            | Angle/°    | Atom | Atom | Atom | Angle/°  |
|-----------------|------|-----------------|------------|------|------|------|----------|
| N1 <sup>1</sup> | Cu1  | N1              | 180.0      | O1   | C4   | C3   | 107.7(3) |
| N2 <sup>1</sup> | Cu1  | N1              | 94.64(12)  | O2   | C5   | O3   | 126.7(3) |
| N2              | Cu1  | N1 <sup>1</sup> | 94.64(12)  | O2   | C5   | C6   | 117.7(3) |
| N2 <sup>1</sup> | Cu1  | N1 <sup>1</sup> | 85.36(12)  | O3   | C5   | C6   | 115.6(3) |
| N2              | Cu1  | N1              | 85.36(12)  | C7   | C6   | C5   | 123.0(3) |
| N2              | Cu1  | N2 <sup>1</sup> | 180.00(11) | C7   | C6   | C11  | 117.9(3) |
| C2              | N1   | Cu1             | 106.1(2)   | C11  | C6   | C5   | 119.0(3) |
| C2              | N1   | C3              | 113.9(3)   | C6   | C7   | C11  | 119.7(3) |
| C3              | N1   | Cu1             | 114.7(2)   | C6   | C7   | C8   | 122.5(3) |
| C1              | N2   | Cu1             | 109.1(2)   | C8   | C7   | C11  | 117.9(3) |
| O4              | N3   | O5              | 123.5(4)   | C9   | C8   | C7   | 117.8(4) |
| O4              | N3   | C9              | 118.9(4)   | C8   | C9   | N3   | 118.5(4) |
| O5              | N3   | C9              | 117.7(4)   | C8   | C9   | C10  | 122.5(3) |
| N2              | C1   | C2              | 108.5(3)   | C10  | C9   | N3   | 119.1(3) |

| Atom | Atom | Atom | Angle/°  | Atom | Atom | Atom | Angle/°  |
|------|------|------|----------|------|------|------|----------|
| N1   | C2   | C1   | 109.4(3) | C9   | C10  | C11  | 118.5(3) |
| N1   | C3   | C4   | 113.5(3) | C6   | C11  | C10  | 120.8(4) |

<sup>1</sup>2-X,-Y,1-Z

**Table S4: Hydrogen Bonding parameter for Complexes 1-3**

| <b>Complex 1</b>          |        |          |          |        |
|---------------------------|--------|----------|----------|--------|
| D-H...A                   | d(D-H) | d(H...A) | <D-H...A | d(D-A) |
| O1-H1...O3                | 0.820  | 1.844    | 170.07   | 2.655  |
| N1-H1B...O2 <sup>a</sup>  | 0.890  | 2.292    | 150.51   | 3.097  |
| C1-H1C...C11 <sup>b</sup> | 0.970  | 2.922    | 158.79   | 3.842  |
| C2-H2B...O4 <sup>c</sup>  | 0.970  | 2.528    | 131.72   | 3.255  |

a = -x+1, -y+1, -z+2; b = -x, -y+1, -z+2; c = -x+1, y+1/2, -z+3/2

| <b>Complex 2</b>         |        |          |          |          |
|--------------------------|--------|----------|----------|----------|
| D-H...A                  | d(D-H) | d(H...A) | <D-H...A | d(D-A)   |
| O1-H1...O3 <sup>a</sup>  | 0.82   | 1.80     | 172      | 2.618(2) |
| N1-H1A...O2 <sup>b</sup> | 0.89   | 2.24     | 159      | 3.081(3) |
| N1-H1B...O2 <sup>c</sup> | 0.89   | 2.28     | 149      | 3.078(2) |
| N2-H2...C11 <sup>d</sup> | 0.98   | 2.81     | 138      | 3.606(8) |
| N2-H2...O2 <sup>d</sup>  | 0.98   | 2.29     | 144      | 3.135(3) |
| C1-H1C...O1 <sup>e</sup> | 0.97   | 2.59     | 161      | 3.519(3) |
| C3-H3A...O5 <sup>f</sup> | 0.97   | 2.43     | 135      | 3.188(3) |
| C8-H8...O4 <sup>g</sup>  | 0.93   | 2.39     | 143      | 3.185(4) |

a = x,y,-1+z; b = -x,1-y,1-z; c = -1+x,y,z; d = 1-x,1-y,1-z; e = -x,2-y,1-z; f = x,y,-1+z; g = 1+x,y,z

| <b>Complex 3</b>          |        |          |          |          |
|---------------------------|--------|----------|----------|----------|
| D-H...A                   | d(D-H) | d(H...A) | <D-H...A | d(D-A)   |
| O1-H1...O3 <sup>a</sup>   | 0.82   | 1.95     | 169      | 2.763(4) |
| N1-H1A...O1               | 0.98   | 2.55     | 105      | 2.963(4) |
| N1-H1A...O3 <sup>b</sup>  | 0.98   | 2.11     | 141      | 2.935(5) |
| N2-H2A...O2 <sup>c</sup>  | 0.89   | 2.28     | 156      | 3.112(4) |
| N2-H2B...O3               | 0.89   | 2.48     | 137      | 3.193(4) |
| C11-H11...O1 <sup>d</sup> | 0.93   | 2.41     | 168      | 3.329(5) |

a = x,1/2-y,-1/2+z; b = 2-x,-y,1-z; c = x,-1+y,z; d = 2-x,1-y,1-z

**Table S5: Comparative analysis of experimental and theoretical vibrational mode frequencies of complexes 1-3.**

| Assignments           | COMPLEX 1                           |                                | COMPLEX 2                           |                                | COMPLEX 3                           |                                |
|-----------------------|-------------------------------------|--------------------------------|-------------------------------------|--------------------------------|-------------------------------------|--------------------------------|
|                       | Experimental IR (cm <sup>-1</sup> ) | Calculated (B3LYP/6-311G(d,p)) | Experimental IR (cm <sup>-1</sup> ) | Calculated (B3LYP/6-311G(d,p)) | Experimental IR (cm <sup>-1</sup> ) | Calculated (B3LYP/6-311G(d,p)) |
| sp <sup>3</sup> (CH)  | 3328                                | 3467                           | 3286                                | 3235                           | 3262                                | 3230                           |
| sp <sup>3</sup> (CH)  | 3094                                | 3093                           | 3159                                | 3131                           | 3006                                | 3038                           |
| sp <sup>3</sup> (CH)  | 2943                                | 3003                           | 2946                                | 3033                           | 2924                                | 3033                           |
| v <sub>as</sub> (COO) | 1582                                | 1572                           | 1594                                | 1584                           | 1598                                | 1591                           |
| v <sub>s</sub> (COO), | 1341                                | 1332                           | 1352                                | 1370                           | 1367                                | 1371                           |
| C—O stretching        | 1068                                | 1060                           | 1038                                | 1031                           | 1237                                | 1228                           |
| C—O stretching        | 1024                                | 1021                           | 906                                 | 891                            | 850                                 | 862                            |
| (Cu—N).               | 522                                 | 527                            | 522                                 | 520                            | 548                                 | 564                            |

**Table S6** Some of characteristic examples of complexes having CuN<sub>4</sub>O<sub>2</sub> chromophore.

| S.No. | Name of complex                                                                                    | Absorption wavelength<br>(nm) | Ref.         |
|-------|----------------------------------------------------------------------------------------------------|-------------------------------|--------------|
| 1.    | [Cu(N- <i>hyden</i> ) <sub>2</sub> ]( <i>o</i> -methoxybz) <sub>2</sub>                            | 578                           | 57           |
| 2.    | [Cu(N- <i>hyden</i> ) <sub>2</sub> ]( <i>m</i> -methoxybz) <sub>2</sub>                            | 582                           | 57           |
| 3.    | [Cu(N- <i>hyden</i> ) <sub>2</sub> ]( <i>p</i> -methoxybz) <sub>2</sub>                            | 580                           | 57           |
| 4.    | [Cu( <i>en</i> ) <sub>2</sub> (H <sub>2</sub> O) <sub>2</sub> ]( <i>m</i> -methoxybz) <sub>2</sub> | 546                           | 59           |
| 5.    | [Cu( <i>en</i> ) <sub>2</sub> (H <sub>2</sub> O) <sub>2</sub> ](3,4,5-trimethoxybz) <sub>2</sub>   | 552                           | 59           |
| 6.    | [Cu( <i>en</i> ) <sub>2</sub> (H <sub>2</sub> O) <sub>2</sub> ]( <i>mef</i> ) <sub>2</sub>         | 555                           | 60           |
| 7.    | [Cu(N- <i>hyden</i> ) <sub>2</sub> ]Cl <sub>2</sub>                                                | 556                           | 61           |
| 8.    | Complex 1                                                                                          | 560                           | Present work |
| 9.    | Complex 2                                                                                          | 575                           | Present work |
| 10.   | Complex 3                                                                                          | 578                           | Present work |

**Table S7:** calculated Mulliken charges of the atoms in complexes 1-3

| Complex 2        |      |                  | Complex 3 |                  |      |                  |      |                  |
|------------------|------|------------------|-----------|------------------|------|------------------|------|------------------|
| Mulliken Charges | Atom | Mulliken Charges | - Atom    | Mulliken Charges | Atom | Mulliken Charges | Atom | Mulliken Charges |
| 0.079            | C29  | -0.431           | C1        | -0.140           | Cu13 | 1.145            | O35  | -0.558           |
| -0.124           | C32  | -0.190           | C2        | 0.060            | N14  | -0.452           | O36  | -0.553           |
| -0.017           | O35  | 0.339            | C3        | -0.201           | N16  | -0.514           |      |                  |
| 0.025            |      |                  | C4        | 0.454            | C17  | 0.268            |      |                  |
| 0.71             |      |                  | C5        | -0.368           | C20  | 0.275            |      |                  |
| -0.175           |      |                  | C6        | -0.013           | C25  | 0.233            |      |                  |
| -0.061           |      |                  | C19       | -0.276           | C28  | 0.422            |      |                  |
| -0.395           |      |                  | C10       | 1.1531           | O31  | -0.643           |      |                  |
| -0.205           |      |                  | O11       | -0.867           | N34  | 1.253            |      |                  |



| Complex 1 |                  |      |                  |      |                  |      |                  |      |                  |      |                  |
|-----------|------------------|------|------------------|------|------------------|------|------------------|------|------------------|------|------------------|
| Atom      | Mulliken Charges | Atom | Mulliken Charges | Atom | Mulliken Charges | Atom | Mulliken Charges | Atom | Mulliken Charges | Atom | Mulliken Charges |
| Cu1       | 0.232            | C12  | 0.202            | C1   | -0.429           | O13  |                  |      |                  |      |                  |
| C12       | 0.548            | C13  | -0.616           | C2   | 0.043            | N14  |                  |      |                  |      |                  |
| O3        | -0.088           | C14  | -0.773           | C3   | -0.464           | O15  |                  |      |                  |      |                  |
| O4        | -0.274           | C15  | 0.143            | C4   | -0.160           | O16  |                  |      |                  |      |                  |
| O5        | -0.300           | C16  | -0.033           | C5   | 0.615            | Cu17 |                  |      |                  |      |                  |
| N6        | -0.234           | C18  | -0.304           | C6   | -0.423           | N18  |                  |      |                  |      |                  |
| O9        | -0.007           | C20  | 0.021            | C10  | 0.543            | N20  |                  |      |                  |      |                  |
| N10       | -0.171           | C22  | -0.343           | C11  | -0.603           | C21  |                  |      |                  |      |                  |
| O11       | -0.004           |      |                  | O12  | -0.032           | C24  |                  |      |                  |      |                  |

**Table S8: General surface information for complexes 1-3**

| General surface information | Complex 1 | Complex 2 | Complex 3 |
|-----------------------------|-----------|-----------|-----------|
| Iso-value                   | 0.05      | 0.5       | 0.5       |
| Volume (Å <sup>3</sup> )    | 552.45    | 471.77    | 493.20    |
| Area (Å <sup>2</sup> )      | 468.53    | 399.26    | 424.76    |
| Globularity                 | 0.695     | 0.734     | 0.711     |
| Asphericity                 | 0.410     | 0.177     | 0.085     |

**Table S9: Surface property information for complexes 1-3**

| Name (property) | Complex 1 |        |       | Complex 2 |        |       | Complex 3 |        |       |
|-----------------|-----------|--------|-------|-----------|--------|-------|-----------|--------|-------|
|                 | Min       | Mean   | Max   | Min       | Mean   | Max   | Min       | Mean   | Max   |
| $d_i$ (Å)       | 0.927     | 1.689  | 2.381 | 0.654     | 1.591  | 2.453 | 0.713     | 1.620  | 2.601 |
| $d_e$ (Å)       | 0.927     | 1.696  | 2.403 | 0.928     | 1.662  | 2.463 | 0.716     | 1.695  | 2.611 |
| $d_{norm}$      | -0.316    | 0.402  | 1.130 | -0.733    | 0.383  | 1.092 | -0.642    | 0.447  | 1.341 |
| Shape index     | -0.995    | 0.209  | 0.995 | -0.990    | 0.216  | 0.996 | -0.997    | 0.209  | 0.999 |
| Curvedness      | -4.023    | -0.960 | 0.132 | -3.969    | -0.927 | 0.355 | -3.708    | -0.940 | 0.359 |

**Table S10: Breaking down the fingerprint by element type, the surface area of close interactions between atoms within and outside of the surface is determined as a proportion of the total surface area for complexes 1-3.**

|                  | Inside atom | Outside atoms |      |      |      |      |      |      |
|------------------|-------------|---------------|------|------|------|------|------|------|
|                  |             | Cu            | Cl   | O    | N    | H    | C    |      |
| <b>Complex 1</b> | <b>C</b>    | 0             | 0.7  | 5.4  | 0.9  | 3.9  | 1.9  | 12.8 |
|                  | <b>Cl</b>   | 0             | 0    | 3.2  | 0.8  | 4.4  | 0.7  | 9.1  |
|                  | <b>Cu</b>   | 0             | 0    | 0    | 0    | 0    | 0    | 0    |
|                  | <b>H</b>    | 0             | 2.7  | 17.1 | 0.1  | 26.6 | 3.2  | 49.7 |
|                  | <b>N</b>    | 0             | 0.8  | 0    | 0    | 0.1  | 0.9  | 1.8  |
|                  | <b>O</b>    | 0             | 2.4  | 0.4  | 0    | 18.6 | 4.8  | 26.2 |
|                  |             | 0             | 6.6  | 26.1 | 1.8  | 53.6 | 11.5 |      |
|                  |             |               |      |      |      |      |      |      |
|                  | Inside atom | Outside atoms |      |      |      |      |      |      |
|                  |             | Cu            | Cl   | O    | H    | N    | C    |      |
| <b>Complex 2</b> | <b>C</b>    | 0             | 0    | 2.5  | 1.9  | 1.1  | 1.9  | 7.9  |
|                  | <b>Cl</b>   | 0             | 0    | 1.0  | 6.3  | 0    | 0    | 7.3  |
|                  | <b>Cu</b>   | 0             | 0    | 0    | 0    | 0    | 0    | 0    |
|                  | <b>H</b>    | 0             | 8.2  | 23.8 | 31.7 | 0    | 2.2  | 65.9 |
|                  | <b>N</b>    | 0             | 0    | 0    | 0.1  | 0    | 1.0  | 1.1  |
|                  | <b>O</b>    | 0             | 0.8  | 1.2  | 14.2 | 0    | 2.2  | 18.4 |
|                  |             | 0             | 9.1  | 28.4 | 54.1 | 1.1  | 7.3  |      |
|                  |             |               |      |      |      |      |      |      |
|                  | Inside atom | Outside atoms |      |      |      |      |      |      |
|                  |             | Cu            | O    | H    | N    | C    | Cl   |      |
| <b>Complex 3</b> | <b>C</b>    | 0             | 1.8  | 4.2  | 0    | 0    | 0.7  | 6.7  |
|                  | <b>Cl</b>   | 0             | 0.8  | 2.0  | 0.5  | 0.6  | 0.8  | 4.8  |
|                  | <b>Cu</b>   | 0             | 0.7  | 0    | 0    | 0    | 0    | 0.7  |
|                  | <b>H</b>    | 0             | 22.1 | 37.4 | 0    | 6.7  | 3.5  | 69.6 |
|                  | <b>N</b>    | 0             | 0.5  | 0    | 0    | 0    | 0.5  | 1    |
|                  | <b>O</b>    | 0             | 1.2  | 13.3 | 0.5  | 1.5  | 0.7  | 17.2 |
|                  |             | 0             | 27.1 | 56.9 | 1.0  | 8.8  | 6.1  |      |
|                  |             |               |      |      |      |      |      |      |

**Table S11: Molecular docking of complexes 1-3 against two Gram-positive bacteria (B. Cereus, S. Aureus) with PDB ID (5V8E, 1BDD) respectively and four Gram-negative bacteria (E. Coli, S. Typhi, P. Aeruginosa, S. Flexneri) with PDB ID (1DIH, 1TJY, 6P8U, 5KH1)**

| Protein<br>(PDB:ID) | Complex 1                                                                    |                            |                           | Complex 2                                                                                        |                            |                           | Complex 3                                                          |                            |                           |
|---------------------|------------------------------------------------------------------------------|----------------------------|---------------------------|--------------------------------------------------------------------------------------------------|----------------------------|---------------------------|--------------------------------------------------------------------|----------------------------|---------------------------|
|                     | Binding residue s                                                            | Inhibition Constant (μMol) | Binding energy (kcal/mol) | Binding residue s                                                                                | Inhibition Constant (μMol) | Binding energy (kcal/mol) | Binding residue s                                                  | Inhibition Constant (μMol) | Binding energy (kcal/mol) |
| <b>5V8E</b>         | Lys103<br>His201<br>His202<br>Ser249<br>Asp314<br>Asp336<br>Ser337<br>Arg359 | 0.7989                     | -8.3                      | Lys103<br>His201<br>Phe250<br>Ser249<br>Asp313<br>Asp314<br>Ser337<br>Phe338<br>Arg359<br>Ser383 | 1.869                      | -7.8                      | Lys103<br>Ser142<br>Lys143<br>His201<br>Ser385<br>Asn386<br>Ser388 | 0.4797                     | -8.6                      |
| <b>1BDD</b>         | Phe6<br>Gln11<br>Pro39                                                       | 10.130                     | -6.8                      | Ala2<br>Asp3<br>Phe6                                                                             | 23.7008                    | -6.3                      | Glut27<br>Glu48                                                    | 23.7008                    | -6.3                      |
| <b>1DIH</b>         | Arg16<br>Met17<br>Arg81<br>Asn128<br>Thr170<br>Arg240<br>Phe243              | 0.6740                     | -8.4                      | His159<br>Val217<br>Arg240<br>Phe243                                                             | 7.210                      | -7.0                      | Arg16<br>Met17<br>Phe79<br>Asn128<br>Thr170<br>Arg240              | 1.576                      | -7.9                      |
| <b>1TJY</b>         | Met106<br>Lys111<br>Ser125<br>Leu282<br>Gly318                               | 3.081                      | -7.5                      | Thr163<br>Thr165<br>Lys172<br>Tyr312                                                             | 14.232                     | -6.6                      | Met106<br>Glu107<br>Lys111<br>Leu282<br>Met286                     | 1.5765                     | -7.9                      |
| <b>6P8U</b>         | Ile81<br>Tyr83<br>Lys122                                                     | 0.946                      | -8.2                      | Arg164<br>Leu207<br>Glu208<br>Leu210<br>Tyr211<br>Gly213                                         | 3.652                      | -7.4                      | Gln22<br>Phe46<br>Leu47<br>Tyr51<br>Ala52<br>Tyr141<br>Lys160      | 2.602                      | -7.6                      |
| <b>5KH1</b>         | Glu418<br>Asp486<br>Glu487<br>Arg554<br>Gln558                               | 3.652                      | -7.4                      | Glut193<br>Leu194<br>Thr212<br>Asp213<br>Pro235                                                  | 5.132                      | -7.2                      | Asp213<br>Pro215<br>Phe462<br>Val465<br>Ser466<br>Gly467           | 0.946                      | -8.2                      |
